# Supplementary material for: PredictSNP: Robust and Accurate Consensus Classifier for Prediction of Disease-Related Mutations
Source: PubMed Central journal article supplement (PMC3894168; doi:10.1371/journal.pcbi.1003440), 2014-01-16
Supplement: pcbi.1003440.s008.pdf [file pcbi.1003440.s008.pdf]

**Table S2.** Composition of PMD testing dataset.

| Amino acid residues | Wild-type           |                       |                        |                  |                       |                        |              |                       |                        |
|---------------------|---------------------|-----------------------|------------------------|------------------|-----------------------|------------------------|--------------|-----------------------|------------------------|
|                     | Pathogenic variants |                       |                        | Neutral variants |                       |                        | All variants |                       |                        |
|                     | Observed            | Expected <sup>a</sup> | O/E ratio <sup>b</sup> | Observed         | Expected <sup>a</sup> | O/E ratio <sup>b</sup> | Observed     | Expected <sup>a</sup> | O/E ratio <sup>b</sup> |
| Ala                 | 45                  | 168                   | 27%                    | 42               | 93                    | 45%                    | 87           | 260                   | 33%                    |
| Arg                 | 198                 | 116                   | 171%                   | 109              | 64                    | 170%                   | 307          | 181                   | 170%                   |
| Asn                 | 59                  | 103                   | 57%                    | 72               | 57                    | 126%                   | 131          | 160                   | 82%                    |
| Asp                 | 199                 | 116                   | 172%                   | 81               | 64                    | 127%                   | 280          | 181                   | 155%                   |
| Cys                 | 137                 | 40                    | 343%                   | 72               | 22                    | 327%                   | 209          | 63                    | 334%                   |
| Gln                 | 59                  | 141                   | 42%                    | 40               | 78                    | 51%                    | 99           | 219                   | 45%                    |
| Glu                 | 113                 | 92                    | 123%                   | 116              | 51                    | 227%                   | 229          | 142                   | 161%                   |
| Gly                 | 99                  | 159                   | 62%                    | 24               | 88                    | 27%                    | 123          | 247                   | 50%                    |
| His                 | 131                 | 49                    | 267%                   | 63               | 27                    | 233%                   | 194          | 76                    | 254%                   |
| Ile                 | 94                  | 123                   | 76%                    | 38               | 68                    | 56%                    | 132          | 191                   | 69%                    |
| Leu                 | 137                 | 203                   | 67%                    | 53               | 113                   | 47%                    | 190          | 316                   | 60%                    |
| Lys                 | 203                 | 130                   | 156%                   | 109              | 72                    | 151%                   | 312          | 201                   | 155%                   |
| Met                 | 23                  | 63                    | 37%                    | 26               | 35                    | 74%                    | 49           | 97                    | 50%                    |
| Phe                 | 86                  | 87                    | 99%                    | 34               | 48                    | 71%                    | 120          | 135                   | 89%                    |
| Pro                 | 69                  | 114                   | 61%                    | 38               | 63                    | 60%                    | 107          | 177                   | 60%                    |
| Ser                 | 143                 | 165                   | 87%                    | 124              | 92                    | 135%                   | 267          | 257                   | 104%                   |
| Thr                 | 96                  | 134                   | 72%                    | 60               | 74                    | 81%                    | 156          | 208                   | 75%                    |
| Trp                 | 90                  | 29                    | 310%                   | 23               | 16                    | 144%                   | 113          | 45                    | 250%                   |
| Tyr                 | 188                 | 74                    | 254%                   | 77               | 41                    | 188%                   | 265          | 115                   | 231%                   |
| Val                 | 80                  | 145                   | 55%                    | 47               | 81                    | 58%                    | 127          | 226                   | 56%                    |
| All                 | 2,249               | 2,249                 |                        | 1,248            | 1,248                 |                        | 3,497        | 3,497                 |                        |

  

| Amino acid residues | Mutant              |                       |                        |                  |                       |                        |              |                       |                        |
|---------------------|---------------------|-----------------------|------------------------|------------------|-----------------------|------------------------|--------------|-----------------------|------------------------|
|                     | Pathogenic variants |                       |                        | Neutral variants |                       |                        | All variants |                       |                        |
|                     | Observed            | Expected <sup>a</sup> | O/E ratio <sup>b</sup> | Observed         | Expected <sup>a</sup> | O/E ratio <sup>b</sup> | Observed     | Expected <sup>a</sup> | O/E ratio <sup>b</sup> |
| Ala                 | 719                 | 168                   | 428%                   | 575              | 93                    | 618%                   | 1,294        | 260                   | 497%                   |
| Arg                 | 138                 | 116                   | 119%                   | 78               | 64                    | 122%                   | 216          | 181                   | 120%                   |
| Asn                 | 125                 | 103                   | 121%                   | 29               | 57                    | 51%                    | 154          | 160                   | 96%                    |
| Asp                 | 66                  | 116                   | 57%                    | 34               | 64                    | 53%                    | 100          | 181                   | 55%                    |
| Cys                 | 48                  | 40                    | 120%                   | 21               | 22                    | 95%                    | 69           | 63                    | 110%                   |
| Gln                 | 86                  | 141                   | 61%                    | 49               | 78                    | 63%                    | 135          | 219                   | 62%                    |
| Glu                 | 109                 | 92                    | 118%                   | 42               | 51                    | 82%                    | 151          | 142                   | 106%                   |
| Gly                 | 74                  | 159                   | 47%                    | 42               | 88                    | 48%                    | 116          | 247                   | 47%                    |
| His                 | 50                  | 49                    | 102%                   | 11               | 27                    | 41%                    | 61           | 76                    | 80%                    |
| Ile                 | 51                  | 123                   | 41%                    | 31               | 68                    | 46%                    | 82           | 191                   | 43%                    |
| Leu                 | 103                 | 203                   | 51%                    | 39               | 113                   | 35%                    | 142          | 316                   | 45%                    |
| Lys                 | 97                  | 130                   | 75%                    | 45               | 72                    | 63%                    | 142          | 201                   | 71%                    |
| Met                 | 31                  | 63                    | 49%                    | 19               | 35                    | 54%                    | 50           | 97                    | 51%                    |
| Phe                 | 128                 | 87                    | 147%                   | 61               | 48                    | 127%                   | 189          | 135                   | 140%                   |
| Pro                 | 49                  | 114                   | 43%                    | 12               | 63                    | 19%                    | 61           | 177                   | 34%                    |
| Ser                 | 164                 | 165                   | 99%                    | 73               | 92                    | 79%                    | 237          | 257                   | 92%                    |
| Thr                 | 65                  | 134                   | 49%                    | 26               | 74                    | 35%                    | 91           | 208                   | 44%                    |
| Trp                 | 20                  | 29                    | 69%                    | 12               | 16                    | 75%                    | 32           | 45                    | 71%                    |
| Tyr                 | 45                  | 74                    | 61%                    | 18               | 41                    | 44%                    | 63           | 115                   | 55%                    |
| Val                 | 81                  | 145                   | 56%                    | 31               | 81                    | 38%                    | 112          | 226                   | 50%                    |
| All                 | 2,249               | 2,249                 |                        | 1,248            | 1,248                 |                        | 3,497        | 3,497                 |                        |

<sup>a</sup> – Expected numbers of amino acid residues were extracted from 105,990 sequences in the non-redundant OWL protein database (release 26.0)<sup>b</sup> – O/E ratio – observed to expected ratio
