# Supplementary material for: PredictSNP: Robust and Accurate Consensus Classifier for Prediction of Disease-Related Mutations
Source: PubMed Central journal article supplement (PMC3894168; doi:10.1371/journal.pcbi.1003440), 2014-01-16
Supplement: pcbi.1003440.s011.pdf [file pcbi.1003440.s011.pdf]

**Table S5.** Performance of prediction tools with PredictSNP benchmark dataset.

|                                 | MAPP          | nsSNPAnalyzer | PANTHER       | PhD-SNP       | PPH-1         | PPH-2         | SIFT          | SNAP          | PredictSNP    |
|---------------------------------|---------------|---------------|---------------|---------------|---------------|---------------|---------------|---------------|---------------|
| <b>True positives</b>           | 14,580        | 7,225         | 5,392         | 13,741        | 12,491        | 16,025        | 15,357        | 11,324        | 14,666        |
| <b>False negatives</b>          | 4,829         | 4,295         | 5,181         | 6,059         | 6,905         | 3,775         | 4,156         | 8,108         | 5,134         |
| <b>True negatives</b>           | 12,828        | 2,016         | 10,377        | 19,196        | 17,225        | 14,281        | 15,230        | 18,229        | 18,131        |
| <b>False positives</b>          | 6,307         | 1,149         | 3,026         | 4,886         | 6,722         | 9,798         | 7,867         | 5,827         | 5,951         |
| <b>Total</b>                    | <b>38,544</b> | <b>14,685</b> | <b>23,976</b> | <b>43,882</b> | <b>43,343</b> | <b>43,879</b> | <b>42,610</b> | <b>43,488</b> | <b>43,882</b> |
| <b>Sensitivity</b> <sup>a</sup> | 0.751         | 0.627         | 0.510         | 0.694         | 0.644         | 0.809         | 0.787         | 0.583         | 0.741         |
| <b>Specificity</b> <sup>a</sup> | 0.670         | 0.637         | 0.774         | 0.797         | 0.719         | 0.593         | 0.659         | 0.758         | 0.753         |
| <b>Precision</b> <sup>a</sup>   | 0.695         | 0.633         | 0.693         | 0.774         | 0.696         | 0.665         | 0.698         | 0.706         | 0.750         |
| <b>NPV</b> <sup>a</sup>         | 0.729         | 0.631         | 0.612         | 0.723         | 0.669         | 0.757         | 0.756         | 0.645         | 0.744         |
| <b>Accuracy</b> <sup>a</sup>    | <b>0.711</b>  | <b>0.632</b>  | <b>0.642</b>  | <b>0.746</b>  | <b>0.682</b>  | <b>0.701</b>  | <b>0.723</b>  | <b>0.670</b>  | <b>0.747</b>  |
| <b>MCC</b> <sup>a</sup>         | <b>0.423</b>  | <b>0.264</b>  | <b>0.295</b>  | <b>0.494</b>  | <b>0.364</b>  | <b>0.412</b>  | <b>0.450</b>  | <b>0.346</b>  | <b>0.494</b>  |
| <b>AUC</b> <sup>a</sup>         | <b>0.773</b>  | <b>0.634</b>  | <b>0.692</b>  | <b>0.812</b>  | <b>0.695</b>  | <b>0.776</b>  | <b>0.784</b>  | <b>0.732</b>  | <b>0.808</b>  |

PPH-1 – PolyPhen-1; PPH-2 – PolyPhen-2; NPV – negative predictive value; MCC – Matthews correlation coefficient; AUC – area under receiver operating characteristics curve; <sup>a</sup> – these metrics were calculated with normalized numbers
