# Supplementary material for: PredictSNP: Robust and Accurate Consensus Classifier for Prediction of Disease-Related Mutations
Source: PubMed Central journal article supplement (PMC3894168; doi:10.1371/journal.pcbi.1003440), 2014-01-16
Supplement: pcbi.1003440.s012.pdf [file pcbi.1003440.s012.pdf]

**Table S6.** Performance of prediction tools with PMD testing dataset.

|                                 | MAPP         | nsSNPAnalyzer | PANTHER      | PhD-SNP      | PPH-1        | PPH-2        | SIFT         | SNAP         | PredictSNP   |
|---------------------------------|--------------|---------------|--------------|--------------|--------------|--------------|--------------|--------------|--------------|
| <b>True positives</b>           | 1,353        | 892           | 390          | 1,521        | 1,468        | 1,846        | 1,379        | 1,345        | 1,738        |
| <b>False negatives</b>          | 294          | 589           | 262          | 728          | 709          | 357          | 275          | 781          | 511          |
| <b>True negatives</b>           | 576          | 482           | 478          | 735          | 773          | 526          | 480          | 756          | 688          |
| <b>False positives</b>          | 613          | 253           | 202          | 513          | 445          | 710          | 579          | 444          | 560          |
| <b>Total</b>                    | <b>2,836</b> | <b>2,216</b>  | <b>1,332</b> | <b>3,497</b> | <b>3,395</b> | <b>3,439</b> | <b>2,713</b> | <b>3,326</b> | <b>3,497</b> |
| <b>Sensitivity</b> <sup>a</sup> | 0.821        | 0.602         | 0.598        | 0.676        | 0.674        | 0.838        | 0.834        | 0.633        | 0.773        |
| <b>Specificity</b> <sup>a</sup> | 0.484        | 0.656         | 0.703        | 0.589        | 0.635        | 0.426        | 0.453        | 0.630        | 0.551        |
| <b>Precision</b> <sup>a</sup>   | 0.614        | 0.636         | 0.668        | 0.622        | 0.649        | 0.593        | 0.604        | 0.631        | 0.633        |
| <b>NPV</b> <sup>a</sup>         | 0.731        | 0.622         | 0.636        | 0.645        | 0.661        | 0.724        | 0.732        | 0.632        | 0.708        |
| <b>Accuracy</b> <sup>a</sup>    | <b>0.653</b> | <b>0.629</b>  | <b>0.651</b> | <b>0.633</b> | <b>0.654</b> | <b>0.632</b> | <b>0.643</b> | <b>0.631</b> | <b>0.662</b> |
| <b>MCC</b> <sup>a</sup>         | <b>0.327</b> | <b>0.258</b>  | <b>0.303</b> | <b>0.266</b> | <b>0.309</b> | <b>0.288</b> | <b>0.310</b> | <b>0.263</b> | <b>0.332</b> |
| <b>AUC</b> <sup>a</sup>         | <b>0.695</b> | <b>0.630</b>  | <b>0.697</b> | <b>0.676</b> | <b>0.658</b> | <b>0.704</b> | <b>0.685</b> | <b>0.667</b> | <b>0.720</b> |

PPH-1 – PolyPhen-1; PPH-2 – PolyPhen-2; NPV – negative predictive value; MCC – Matthews correlation coefficient; AUC – area under receiver operating characteristics curve; <sup>a</sup> – these metrics were calculated with normalized numbers
