# Supplementary material for: PredictSNP: Robust and Accurate Consensus Classifier for Prediction of Disease-Related Mutations
Source: PubMed Central journal article supplement (PMC3894168; doi:10.1371/journal.pcbi.1003440), 2014-01-16
Supplement: pcbi.1003440.s013.pdf [file pcbi.1003440.s013.pdf]

**Table S7.** Performance of prediction tools with MMP testing dataset.

|                                 | MAPP          | nsSNPAnalyzer | PANTHER      | PhD-SNP       | PPH-1         | PPH-2         | SIFT          | SNAP          | PredictSNP    |
|---------------------------------|---------------|---------------|--------------|---------------|---------------|---------------|---------------|---------------|---------------|
| <b>True positives</b>           | 3,337         | 2,510         | 829          | 3,399         | 3,330         | 3,769         | 3,675         | 3,163         | 3,773         |
| <b>False negatives</b>          | 1,113         | 1,518         | 1,428        | 1,058         | 944           | 505           | 416           | 1,293         | 683           |
| <b>True negatives</b>           | 4,990         | 4,264         | 4,336        | 3,739         | 4,390         | 3,518         | 2,887         | 5,338         | 4,291         |
| <b>False positives</b>          | 2,530         | 2,687         | 834          | 3,798         | 3,053         | 3,925         | 4,463         | 2,200         | 3,247         |
| <b>Total</b>                    | <b>11,970</b> | <b>10,979</b> | <b>7,427</b> | <b>11,994</b> | <b>11,717</b> | <b>11,717</b> | <b>11,441</b> | <b>11,994</b> | <b>11,994</b> |
| <b>Sensitivity</b> <sup>a</sup> | 0.750         | 0.623         | 0.367        | 0.763         | 0.779         | 0.882         | 0.898         | 0.710         | 0.847         |
| <b>Specificity</b> <sup>a</sup> | 0.664         | 0.613         | 0.839        | 0.496         | 0.590         | 0.473         | 0.393         | 0.708         | 0.569         |
| <b>Precision</b> <sup>a</sup>   | 0.690         | 0.617         | 0.695        | 0.602         | 0.655         | 0.626         | 0.597         | 0.709         | 0.663         |
| <b>NPV</b> <sup>a</sup>         | 0.726         | 0.619         | 0.570        | 0.676         | 0.728         | 0.800         | 0.794         | 0.709         | 0.788         |
| <b>Accuracy</b> <sup>a</sup>    | <b>0.707</b>  | <b>0.618</b>  | <b>0.603</b> | <b>0.629</b>  | <b>0.684</b>  | <b>0.677</b>  | <b>0.646</b>  | <b>0.709</b>  | <b>0.708</b>  |
| <b>MCC</b> <sup>a</sup>         | <b>0.415</b>  | <b>0.237</b>  | <b>0.234</b> | <b>0.268</b>  | <b>0.376</b>  | <b>0.389</b>  | <b>0.337</b>  | <b>0.418</b>  | <b>0.433</b>  |
| <b>AUC</b> <sup>a</sup>         | <b>0.759</b>  | <b>0.620</b>  | <b>0.676</b> | <b>0.685</b>  | <b>0.720</b>  | <b>0.774</b>  | <b>0.710</b>  | <b>0.769</b>  | <b>0.787</b>  |

PPH-1 – PolyPhen-1; PPH-2 – PolyPhen-2; NPV – negative predictive value; MCC – Matthews correlation coefficient; AUC – area under receiver operating characteristics curve; <sup>a</sup> – these metrics were calculated with normalized numbers
