# Supplementary material for: PredictSNP: Robust and Accurate Consensus Classifier for Prediction of Disease-Related Mutations
Source: PubMed Central journal article supplement (PMC3894168; doi:10.1371/journal.pcbi.1003440), 2014-01-16
Supplement: pcbi.1003440.s014.pdf [file pcbi.1003440.s014.pdf]

**Table S8.** Performance of prediction tools with OVERFIT testing dataset.

|                                                                             | MAPP             | nsSNPAnalyzer | PANTHER          | PhD-SNP       | PPH-1            | PPH-2         | SIFT             | SNAP          | PredictSNP       |
|-----------------------------------------------------------------------------|------------------|---------------|------------------|---------------|------------------|---------------|------------------|---------------|------------------|
| <b>True positives</b>                                                       | 8,738            | 7,635         | 5,584            | 14,837        | 12,500           | 15,609        | 14,079           | 8,157         | 14,747           |
| <b>False negatives</b>                                                      | 3,665            | 3,242         | 3,455            | 2,852         | 4,884            | 2,085         | 2,700            | 4,314         | 2,948            |
| <b>True negatives</b>                                                       | 10,355           | 1,977         | 8,484            | 13,292        | 11,189           | 9,729         | 9,905            | 11,963        | 12,261           |
| <b>False positives</b>                                                      | 2,482            | 1,804         | 2,2224           | 1,781         | 3,728            | 5,302         | 4,329            | 3,017         | 2,820            |
| <b>Total</b>                                                                | <b>25,240</b>    | <b>14,658</b> | <b>19,474</b>    | <b>32,762</b> | <b>32,301</b>    | <b>32,725</b> | <b>31,013</b>    | <b>27,451</b> | <b>32,776</b>    |
| <b>Sensitivity<sup>a</sup></b>                                              | 0.705            | 0.702         | 0.618            | 0.839         | 0.719            | 0.882         | 0.839            | 0.654         | 0.833            |
| <b>Specificity<sup>a</sup></b>                                              | 0.807            | 0.523         | 0.792            | 0.161         | 0.750            | 0.647         | 0.696            | 0.799         | 0.813            |
| <b>Precision<sup>a</sup></b>                                                | 0.785            | 0.595         | 0.748            | 0.877         | 0.742            | 0.714         | 0.734            | 0.765         | 0.817            |
| <b>NPV<sup>a</sup></b>                                                      | 0.732            | 0.637         | 0.675            | 0.845         | 0.728            | 0.846         | 0.812            | 0.698         | 0.830            |
| <b>Accuracy<sup>a</sup></b>                                                 | <b>0.756</b>     | <b>0.612</b>  | <b>0.705</b>     | <b>0.860</b>  | <b>0.735</b>     | <b>0.765</b>  | <b>0.767</b>     | <b>0.726</b>  | <b>0.823</b>     |
| <b>MCC<sup>a</sup></b>                                                      | <b>0.514</b>     | <b>0.229</b>  | <b>0.416</b>     | <b>0.721</b>  | <b>0.469</b>     | <b>0.545</b>  | <b>0.541</b>     | <b>0.457</b>  | <b>0.647</b>     |
| <b>AUC<sup>a</sup></b>                                                      | <b>0.823</b>     | <b>0.614</b>  | <b>0.779</b>     | <b>0.926</b>  | <b>0.733</b>     | <b>0.849</b>  | <b>0.835</b>     | <b>0.798</b>  | <b>0.889</b>     |
| <b>Size of training dataset</b>                                             | N/A <sup>b</sup> | 4,013         | N/A <sup>b</sup> | 34,314        | N/A <sup>b</sup> | 12,392        | N/A <sup>b</sup> | 81,312        | N/A <sup>b</sup> |
| <b>Overlap between OVERFIT dataset and the training dataset of a tool</b>   | N/A <sup>b</sup> | 3,456         | N/A <sup>b</sup> | 30,889        | N/A <sup>b</sup> | 5,329         | N/A <sup>b</sup> | 1,173         | N/A <sup>b</sup> |
| <b>Part of OVERFIT dataset composed from the training dataset of a tool</b> | N/A <sup>b</sup> | 10.5%         | N/A <sup>b</sup> | 94.2%         | N/A <sup>b</sup> | 16.3%         | N/A <sup>b</sup> | 3.6%          | N/A <sup>b</sup> |

PPH-1 – PolyPhen-1; PPH-2 – PolyPhen-2; NPV – negative predictive value; MCC – Matthews correlation coefficient; AUC – area under receiver operating characteristics curve; <sup>a</sup> – these metrics were calculated with normalized numbers; <sup>b</sup> – no training dataset available
