# Supplementary material for: PredictSNP: Robust and Accurate Consensus Classifier for Prediction of Disease-Related Mutations
Source: PubMed Central journal article supplement (PMC3894168; doi:10.1371/journal.pcbi.1003440), 2014-01-16
Supplement: pcbi.1003440.s016.pdf [file pcbi.1003440.s016.pdf]

**Table S10.** Pairwise correlation of integrated tools.

|                | <b>MAPP</b> | <b>PhD-SNP</b> | <b>PPH1</b> | <b>PPH2</b> | <b>SIFT</b> |
|----------------|-------------|----------------|-------------|-------------|-------------|
| <b>PhD-SNP</b> | 0.54        |                |             |             |             |
| <b>PPH1</b>    | 0.48        | 0.48           |             |             |             |
| <b>PPH2</b>    | 0.51        | 0.49           | 0.55        |             |             |
| <b>SIFT</b>    | 0.59        | 0.55           | 0.56        | 0.62        |             |
| <b>SNAP</b>    | 0.47        | 0.47           | 0.54        | 0.49        | 0.53        |

PPH-1 – PolyPhen-1; PPH-2 – PolyPhen-2
