# Supplementary material for: PredictSNP: Robust and Accurate Consensus Classifier for Prediction of Disease-Related Mutations
Source: PLoS Comput Biol. 2014 Jan 16;10(1):e1003440. doi: 10.1371/journal.pcbi.1003440 (PMC3894168; doi:10.1371/journal.pcbi.1003440)
Supplement: Table S1 — Composition of PredictSNP benchmark dataset. (PDF) [file pcbi.1003440.s007.pdf]

**Table S1.** Composition of PredictSNP benchmark dataset.

| Amino acid residues | Wild-type           |                       |                        |                  |                       |                        |              |                       |                        |
|---------------------|---------------------|-----------------------|------------------------|------------------|-----------------------|------------------------|--------------|-----------------------|------------------------|
|                     | Pathogenic variants |                       |                        | Neutral variants |                       |                        | All variants |                       |                        |
|                     | Observed            | Expected <sup>a</sup> | O/E ratio <sup>b</sup> | Observed         | Expected <sup>a</sup> | O/E ratio <sup>b</sup> | Observed     | Expected <sup>a</sup> | O/E ratio <sup>b</sup> |
| Ala                 | 1,296               | 1,475                 | 88%                    | 2,134            | 1,794                 | 119%                   | 3,430        | 3,268                 | 105%                   |
| Arg                 | 2,196               | 1,022                 | 215%                   | 2,826            | 1,244                 | 227%                   | 5,022        | 2,266                 | 222%                   |
| Asn                 | 570                 | 904                   | 63%                    | 994              | 1,100                 | 90%                    | 1,564        | 2,005                 | 78%                    |
| Asp                 | 1,032               | 1,022                 | 101%                   | 1,064            | 1,244                 | 86%                    | 2,096        | 2,266                 | 92%                    |
| Cys                 | 1,165               | 354                   | 329%                   | 489              | 430                   | 114%                   | 1,654        | 784                   | 211%                   |
| Gln                 | 480                 | 1,239                 | 39%                    | 981              | 1,507                 | 65%                    | 1,461        | 2,745                 | 53%                    |
| Glu                 | 962                 | 806                   | 119%                   | 1,369            | 980                   | 140%                   | 2,331        | 1,787                 | 130%                   |
| Gly                 | 2,326               | 1,396                 | 167%                   | 1,363            | 1,698                 | 80%                    | 3,689        | 3,094                 | 119%                   |
| His                 | 567                 | 433                   | 131%                   | 632              | 526                   | 120%                   | 1,199        | 959                   | 125%                   |
| Ile                 | 731                 | 1,081                 | 68%                    | 1,094            | 1,315                 | 83%                    | 1,825        | 2,397                 | 76%                    |
| Leu                 | 1,598               | 1,789                 | 89%                    | 1,422            | 2,176                 | 65%                    | 3,020        | 3,966                 | 76%                    |
| Lys                 | 566                 | 1,140                 | 50%                    | 896              | 1,387                 | 65%                    | 1,462        | 2,527                 | 58%                    |
| Met                 | 553                 | 551                   | 100%                   | 686              | 670                   | 102%                   | 1,239        | 1,220                 | 102%                   |
| Phe                 | 567                 | 767                   | 74%                    | 483              | 933                   | 52%                    | 1,050        | 1,700                 | 62%                    |
| Pro                 | 1,183               | 1,003                 | 118%                   | 1,541            | 1,220                 | 126%                   | 2,724        | 2,222                 | 123%                   |
| Ser                 | 1,137               | 1,455                 | 78%                    | 1,896            | 1,770                 | 107%                   | 3,033        | 3,225                 | 94%                    |
| Thr                 | 885                 | 1,180                 | 75%                    | 1,681            | 1,435                 | 117%                   | 2,566        | 2,615                 | 98%                    |
| Trp                 | 395                 | 256                   | 154%                   | 189              | 311                   | 61%                    | 584          | 567                   | 103%                   |
| Tyr                 | 624                 | 649                   | 96%                    | 415              | 789                   | 53%                    | 1,039        | 1,438                 | 72%                    |
| Val                 | 967                 | 1,278                 | 76%                    | 1,927            | 1,554                 | 124%                   | 2,894        | 2,833                 | 102%                   |
| All                 | 19,800              | 19,800                |                        | 24,082           | 24,082                |                        | 43,882       | 43,882                |                        |

  

| Amino acid residues | Mutant              |                       |                        |                  |                       |                        |              |                       |                        |
|---------------------|---------------------|-----------------------|------------------------|------------------|-----------------------|------------------------|--------------|-----------------------|------------------------|
|                     | Pathogenic variants |                       |                        | Neutral variants |                       |                        | All variants |                       |                        |
|                     | Observed            | Expected <sup>a</sup> | O/E ratio <sup>b</sup> | Observed         | Expected <sup>a</sup> | O/E ratio <sup>b</sup> | Observed     | Expected <sup>a</sup> | O/E ratio <sup>b</sup> |
| Ala                 | 658                 | 1,475                 | 45%                    | 1,275            | 1,794                 | 71%                    | 1,933        | 3,268                 | 59%                    |
| Arg                 | 2,210               | 1,022                 | 216%                   | 1,739            | 1,244                 | 140%                   | 3,949        | 2,266                 | 174%                   |
| Asn                 | 761                 | 904                   | 84%                    | 956              | 1,100                 | 87%                    | 1,717        | 2,005                 | 86%                    |
| Asp                 | 936                 | 1,022                 | 92%                    | 738              | 1,244                 | 59%                    | 1,674        | 2,266                 | 74%                    |
| Cys                 | 1,230               | 354                   | 347%                   | 825              | 430                   | 192%                   | 2,055        | 784                   | 262%                   |
| Gln                 | 635                 | 1,239                 | 51%                    | 1,201            | 1,507                 | 80%                    | 1,836        | 2,745                 | 67%                    |
| Glu                 | 745                 | 806                   | 92%                    | 915              | 980                   | 93%                    | 1,660        | 1,787                 | 93%                    |
| Gly                 | 916                 | 1,396                 | 66%                    | 1,494            | 1,698                 | 88%                    | 2,410        | 3,094                 | 78%                    |
| His                 | 801                 | 433                   | 185%                   | 1,094            | 526                   | 208%                   | 1,895        | 959                   | 198%                   |
| Ile                 | 617                 | 1,081                 | 57%                    | 1,312            | 1,315                 | 100%                   | 1,929        | 2,397                 | 80%                    |
| Leu                 | 1,173               | 1,789                 | 66%                    | 1,630            | 2,176                 | 75%                    | 2,803        | 3,966                 | 71%                    |
| Lys                 | 871                 | 1,140                 | 76%                    | 1,234            | 1,387                 | 89%                    | 2,105        | 2,527                 | 83%                    |
| Met                 | 562                 | 551                   | 102%                   | 932              | 670                   | 139%                   | 1,494        | 1,220                 | 122%                   |
| Phe                 | 686                 | 767                   | 89%                    | 888              | 933                   | 95%                    | 1,574        | 1,700                 | 93%                    |
| Pro                 | 1,667               | 1,003                 | 166%                   | 1,316            | 1,220                 | 108%                   | 2,983        | 2,222                 | 134%                   |
| Ser                 | 1,607               | 1,455                 | 110%                   | 1,958            | 1,770                 | 111%                   | 3,565        | 3,225                 | 111%                   |
| Thr                 | 1,047               | 1,180                 | 89%                    | 1,736            | 1,435                 | 121%                   | 2,783        | 2,615                 | 106%                   |
| Trp                 | 594                 | 256                   | 232%                   | 505              | 311                   | 162%                   | 1,099        | 567                   | 194%                   |
| Tyr                 | 786                 | 649                   | 121%                   | 460              | 789                   | 58%                    | 1,246        | 1,438                 | 87%                    |
| Val                 | 1,298               | 1,278                 | 102%                   | 1,874            | 1,554                 | 121%                   | 3,172        | 2,833                 | 112%                   |
| All                 | 19,800              | 19,800                |                        | 24,082           | 24,082                |                        | 43,882       | 43,882                |                        |

<sup>a</sup> – Expected numbers of amino acid residues were extracted from 105,990 sequences in the non-redundant OWL protein database (release 26.0)<sup>b</sup> – O/E ratio – observed to expected ratio
