# Supplementary material for: PredictSNP: Robust and Accurate Consensus Classifier for Prediction of Disease-Related Mutations
Source: PLoS Comput Biol. 2014 Jan 16;10(1):e1003440. doi: 10.1371/journal.pcbi.1003440 (PMC3894168; doi:10.1371/journal.pcbi.1003440)
Supplement: Table S3 — Composition of MMP testing dataset. (PDF) [file pcbi.1003440.s009.pdf]

**Table S3.** Composition of MMP testing dataset.

| Amino acid residues | Wild-type           |                       |                        |                  |                       |                        |              |                       |                        |
|---------------------|---------------------|-----------------------|------------------------|------------------|-----------------------|------------------------|--------------|-----------------------|------------------------|
|                     | Pathogenic variants |                       |                        | Neutral variants |                       |                        | All variants |                       |                        |
|                     | Observed            | Expected <sup>a</sup> | O/E ratio <sup>b</sup> | Observed         | Expected <sup>a</sup> | O/E ratio <sup>b</sup> | Observed     | Expected <sup>a</sup> | O/E ratio <sup>b</sup> |
| Ala                 | 468                 | 332                   | 141%                   | 667              | 561                   | 119%                   | 1,135        | 893                   | 127%                   |
| Arg                 | 209                 | 230                   | 91%                    | 368              | 389                   | 95%                    | 577          | 619                   | 93%                    |
| Asn                 | 212                 | 204                   | 104%                   | 582              | 344                   | 169%                   | 794          | 548                   | 145%                   |
| Asp                 | 238                 | 230                   | 103%                   | 387              | 389                   | 99%                    | 625          | 619                   | 101%                   |
| Cys                 | 10                  | 80                    | 13%                    | 33               | 135                   | 24%                    | 43           | 214                   | 20%                    |
| Gln                 | 74                  | 278                   | 27%                    | 285              | 472                   | 60%                    | 359          | 750                   | 48%                    |
| Glu                 | 70                  | 181                   | 39%                    | 265              | 307                   | 86%                    | 335          | 488                   | 69%                    |
| Gly                 | 599                 | 314                   | 191%                   | 506              | 531                   | 95%                    | 1,105        | 846                   | 131%                   |
| His                 | 149                 | 97                    | 154%                   | 191              | 165                   | 116%                   | 340          | 262                   | 130%                   |
| Ile                 | 303                 | 243                   | 125%                   | 308              | 412                   | 75%                    | 611          | 655                   | 93%                    |
| Leu                 | 453                 | 403                   | 112%                   | 505              | 681                   | 74%                    | 958          | 1,084                 | 88%                    |
| Lys                 | 110                 | 257                   | 43%                    | 614              | 434                   | 141%                   | 724          | 691                   | 105%                   |
| Met                 | 96                  | 124                   | 77%                    | 130              | 210                   | 62%                    | 226          | 333                   | 68%                    |
| Phe                 | 128                 | 173                   | 74%                    | 69               | 292                   | 24%                    | 197          | 465                   | 42%                    |
| Pro                 | 196                 | 226                   | 87%                    | 349              | 382                   | 91%                    | 545          | 607                   | 90%                    |
| Ser                 | 254                 | 327                   | 78%                    | 754              | 554                   | 136%                   | 1,008        | 881                   | 114%                   |
| Thr                 | 310                 | 266                   | 117%                   | 610              | 449                   | 136%                   | 920          | 715                   | 129%                   |
| Trp                 | 47                  | 58                    | 81%                    | 93               | 97                    | 96%                    | 140          | 155                   | 90%                    |
| Tyr                 | 149                 | 146                   | 102%                   | 345              | 247                   | 140%                   | 494          | 393                   | 126%                   |
| Val                 | 381                 | 287                   | 133%                   | 477              | 487                   | 98%                    | 858          | 774                   | 111%                   |
| All                 | 4,456               | 4,456                 |                        | 7,538            | 7,538                 |                        | 11,994       | 11,994                |                        |

  

| Amino acid residues | Mutant              |                       |                        |                  |                       |                        |              |                       |                        |
|---------------------|---------------------|-----------------------|------------------------|------------------|-----------------------|------------------------|--------------|-----------------------|------------------------|
|                     | Pathogenic variants |                       |                        | Neutral variants |                       |                        | All variants |                       |                        |
|                     | Observed            | Expected <sup>a</sup> | O/E ratio <sup>b</sup> | Observed         | Expected <sup>a</sup> | O/E ratio <sup>b</sup> | Observed     | Expected <sup>a</sup> | O/E ratio <sup>b</sup> |
| Ala                 | 235                 | 332                   | 71%                    | 591              | 561                   | 105%                   | 826          | 893                   | 92%                    |
| Arg                 | 340                 | 230                   | 148%                   | 408              | 389                   | 105%                   | 748          | 619                   | 121%                   |
| Asn                 | 133                 | 204                   | 65%                    | 264              | 344                   | 77%                    | 397          | 548                   | 72%                    |
| Asp                 | 161                 | 230                   | 70%                    | 237              | 389                   | 61%                    | 398          | 619                   | 64%                    |
| Cys                 | 190                 | 80                    | 238%                   | 474              | 135                   | 351%                   | 664          | 214                   | 310%                   |
| Gln                 | 215                 | 279                   | 77%                    | 425              | 472                   | 90%                    | 640          | 750                   | 85%                    |
| Glu                 | 295                 | 181                   | 163%                   | 382              | 307                   | 124%                   | 677          | 488                   | 139%                   |
| Gly                 | 270                 | 314                   | 86%                    | 515              | 531                   | 97%                    | 785          | 846                   | 93%                    |
| His                 | 232                 | 97                    | 239%                   | 420              | 165                   | 255%                   | 652          | 262                   | 249%                   |
| Ile                 | 141                 | 243                   | 58%                    | 281              | 412                   | 68%                    | 422          | 655                   | 64%                    |
| Leu                 | 230                 | 403                   | 57%                    | 481              | 681                   | 71%                    | 711          | 1 084                 | 66%                    |
| Lys                 | 314                 | 257                   | 122%                   | 308              | 434                   | 71%                    | 622          | 691                   | 90%                    |
| Met                 | 123                 | 124                   | 99%                    | 279              | 210                   | 133%                   | 402          | 333                   | 121%                   |
| Phe                 | 248                 | 173                   | 143%                   | 422              | 292                   | 145%                   | 670          | 465                   | 144%                   |
| Pro                 | 410                 | 226                   | 181%                   | 291              | 382                   | 76%                    | 701          | 607                   | 115%                   |
| Ser                 | 193                 | 327                   | 59%                    | 542              | 554                   | 98%                    | 735          | 881                   | 83%                    |
| Thr                 | 136                 | 266                   | 51%                    | 315              | 449                   | 70%                    | 451          | 715                   | 63%                    |
| Trp                 | 185                 | 58                    | 319%                   | 196              | 97                    | 202%                   | 381          | 155                   | 246%                   |
| Tyr                 | 251                 | 146                   | 172%                   | 384              | 247                   | 155%                   | 635          | 393                   | 162%                   |
| Val                 | 154                 | 286                   | 54%                    | 323              | 487                   | 66%                    | 477          | 774                   | 62%                    |
| All                 | 4,456               | 4,456                 |                        | 7,538            | 7,538                 |                        | 43,882       | 43,882                |                        |

<sup>a</sup> – Expected numbers of amino acid residues were extracted from 105,990 sequences in the non-redundant OWL protein database (release 26.0)<sup>b</sup> – O/E ratio – observed to expected ratio
