# Supplementary material for: PredictSNP: Robust and Accurate Consensus Classifier for Prediction of Disease-Related Mutations
Source: PLoS Comput Biol. 2014 Jan 16;10(1):e1003440. doi: 10.1371/journal.pcbi.1003440 (PMC3894168; doi:10.1371/journal.pcbi.1003440)
Supplement: Table S9 — Comparison of performance evaluation with Thusberg dataset and PredictSNP benchmark dataset. (PDF) [file pcbi.1003440.s015.pdf]

**Table S9.** Comparison of performance evaluation with Thusberg dataset and PredictSNP benchmark dataset.

|                                                                        | Testing dataset       | MAPP           | nsSNPAnalyzer | PANTHER        | PhD-SNP | PPH1           | PPH2   | SIFT           | SNAP   | MutPred        | SNPs&GO        |
|------------------------------------------------------------------------|-----------------------|----------------|---------------|----------------|---------|----------------|--------|----------------|--------|----------------|----------------|
| Percent of evaluated mutations                                         | Thusberg <sup>a</sup> | - <sup>b</sup> | 23.2          | 59.3           | 98.7    | 99.1           | 99.3   | 86.3           | 80.8   | 90.8           | 92.9           |
|                                                                        | PredictSNP benchmark  | 87.8           | 33.5          | 54.6           | 100.0   | 98.8           | 100.0  | 97.1           | 99.1   | - <sup>c</sup> | - <sup>c</sup> |
|                                                                        | Difference            | - <sup>b</sup> | -10.3         | 4.7            | -1.3    | 0.3            | -0.7   | -10.8          | -18.3  | - <sup>c</sup> | - <sup>c</sup> |
| Accuracy <sup>d</sup>                                                  | Thusberg <sup>a</sup> | - <sup>b</sup> | 0.600         | 0.760          | 0.710   | 0.700          | 0.690  | 0.650          | 0.720  | 0.810          | 0.820          |
|                                                                        | PredictSNP benchmark  | 0.711          | 0.632         | 0.642          | 0.746   | 0.682          | 0.701  | 0.723          | 0.670  | - <sup>c</sup> | - <sup>c</sup> |
|                                                                        | Difference            | - <sup>b</sup> | -0.032        | 0.118          | -0.036  | 0.018          | -0.011 | -0.073         | 0.050  | - <sup>c</sup> | - <sup>c</sup> |
| Matthews correlation coefficient <sup>d</sup>                          | Thusberg <sup>a</sup> | - <sup>b</sup> | 0.190         | 0.530          | 0.430   | 0.400          | 0.390  | 0.300          | 0.470  | 0.630          | 0.650          |
|                                                                        | PredictSNP benchmark  | 0.423          | 0.264         | 0.295          | 0.494   | 0.364          | 0.412  | 0.450          | 0.346  | - <sup>c</sup> | - <sup>c</sup> |
|                                                                        | Difference            | - <sup>b</sup> | -0.074        | 0.235          | -0.064  | 0.036          | -0.022 | -0.150         | 0.124  | - <sup>c</sup> | - <sup>c</sup> |
| Size of the training dataset of evaluated tool                         |                       | - <sup>e</sup> | 4,013         | - <sup>e</sup> | 34,314  | - <sup>e</sup> | 12,392 | - <sup>e</sup> | 31,812 | 65,656         | 38,469         |
| Overlap between testing dataset and the training dataset of a tool     | Thusberg <sup>a</sup> | - <sup>e</sup> | 2,791         | - <sup>e</sup> | 15,500  | - <sup>e</sup> | 3,222  | - <sup>e</sup> | 856    | 20,333         | 16,222         |
|                                                                        | PredictSNP benchmark  | - <sup>e</sup> | 0             | - <sup>e</sup> | 0       | - <sup>e</sup> | 0      | - <sup>e</sup> | 0      | - <sup>c</sup> | - <sup>c</sup> |
| Part of the testing dataset composed from the training dataset of tool | Thusberg <sup>a</sup> | - <sup>e</sup> | 6.9%          | - <sup>e</sup> | 38.3%   | - <sup>e</sup> | 8.0%   | - <sup>e</sup> | 2.1%   | 50.2%          | 40.0%          |
|                                                                        | PredictSNP benchmark  | - <sup>e</sup> | 0.0%          | - <sup>e</sup> | 0.0%    | - <sup>e</sup> | 0.0%   | - <sup>e</sup> | 0.0%   | - <sup>c</sup> | - <sup>c</sup> |

PPH-1 – PolyPhen-1; PPH-2 – PolyPhen-2; <sup>a</sup> – results of performance evaluation taken from Thusberg *et al.* [25]; <sup>b</sup> – this tool was not evaluated with Thusberg dataset; <sup>c</sup> – this tool was not evaluated with PredictSNP benchmark dataset

<sup>d</sup> – these metrics were calculated with normalized numbers; <sup>e</sup> – no training dataset available
