# Supplementary material for: PredictSNP: Robust and Accurate Consensus Classifier for Prediction of Disease-Related Mutations
Source: PLoS Comput Biol. 2014 Jan 16;10(1):e1003440. doi: 10.1371/journal.pcbi.1003440 (PMC3894168; doi:10.1371/journal.pcbi.1003440)
Supplement: Table S11 — Performance of selected machine learning methods with PredictSNP, PMD and MMP datasets. (PDF) [file pcbi.1003440.s017.pdf]

**Table S11.** Performance of selected machine learning methods with PredictSNP, PMD and MMP datasets.

|                                                     | Dataset    | Weighted majority<br>vote | Naïve Bayes | Logistic<br>regression | Neural<br>network | Support vector<br>machine | Nearest<br>neighbor | Random forest |
|-----------------------------------------------------|------------|---------------------------|-------------|------------------------|-------------------|---------------------------|---------------------|---------------|
| Accuracy <sup>a</sup>                               | PredictSNP | 0.747                     | 0.741       | 0.760                  | 0.758             | 0.758                     | 0.678               | 0.713         |
|                                                     | PMD        | 0.662                     | 0.747       | 0.652                  | 0.652             | 0.656                     | 0.592               | 0.642         |
|                                                     | MMP        | 0.708                     | 0.683       | 0.671                  | 0.685             | 0.682                     | 0.604               | 0.661         |
| Matthews<br>correlation<br>coefficient <sup>a</sup> | PredictSNP | 0.494                     | 0.484       | 0.522                  | 0.524             | 0.517                     | 0.357               | 0.448         |
|                                                     | PMD        | 0.332                     | 0.308       | 0.306                  | 0.304             | 0.317                     | 0.184               | 0.286         |
|                                                     | MMP        | 0.433                     | 0.400       | 0.357                  | 0.374             | 0.384                     | 0.213               | 0.323         |

<sup>a</sup> – these metrics were calculated with normalized numbers
