# Supplementary material for: PredictSNP: Robust and Accurate Consensus Classifier for Prediction of Disease-Related Mutations
Source: PLoS Comput Biol. 2014 Jan 16;10(1):e1003440. doi: 10.1371/journal.pcbi.1003440 (PMC3894168; doi:10.1371/journal.pcbi.1003440)
Supplement: Table S12 — Performance of consensus classifiers with PMD-UNIPROT and MMP datasets. (PDF) [file pcbi.1003440.s018.pdf]

**Table S12.** Performance of consensus classifiers with PMD-UNIPROT and MMP datasets.

|                                | PMD-UNIPROT  |              |              | MMP           |               |               |
|--------------------------------|--------------|--------------|--------------|---------------|---------------|---------------|
|                                | CONDEL       | Meta-SNP     | PredictSNP   | CONDEL        | Meta-SNP      | PredictSNP    |
| <b>True positives</b>          | 872          | 676          | 714          | 4,181         | 3,329         | 3,773         |
| <b>False negatives</b>         | 40           | 236          | 198          | 276           | 1,119         | 683           |
| <b>True negatives</b>          | 87           | 310          | 298          | 2,583         | 4,495         | 4,291         |
| <b>False positives</b>         | 431          | 208          | 2220         | 4,954         | 3,015         | 3,247         |
| <b>Total</b>                   | <b>1,430</b> | <b>1,430</b> | <b>1,430</b> | <b>11,994</b> | <b>11,958</b> | <b>11,994</b> |
| <b>Sensitivity<sup>a</sup></b> | 0.956        | 0.741        | 0.783        | 0.938         | 0.748         | 0.847         |
| <b>Specificity<sup>a</sup></b> | 0.168        | 0.598        | 0.575        | 0.343         | 0.599         | 0.569         |
| <b>Precision<sup>a</sup></b>   | 0.535        | 0.649        | 0.648        | 0.588         | 0.651         | 0.663         |
| <b>NPV<sup>a</sup></b>         | 0.793        | 0.698        | 0.726        | 0.847         | 0.704         | 0.788         |
| <b>Accuracy<sup>a</sup></b>    | <b>0.562</b> | <b>0.670</b> | <b>0.679</b> | <b>0.640</b>  | <b>0.673</b>  | <b>0.708</b>  |
| <b>MCC<sup>a</sup></b>         | <b>0.202</b> | <b>0.343</b> | <b>0.366</b> | <b>0.349</b>  | <b>0.351</b>  | <b>0.433</b>  |
| <b>AUC<sup>a</sup></b>         | <b>0.755</b> | <b>0.709</b> | <b>0.732</b> | <b>0.770</b>  | <b>0.730</b>  | <b>0.780</b>  |

NPV – negative predictive value; MCC – Matthews correlation coefficient; AUC – area under receiver operating characteristics curve; <sup>a</sup> – these metrics were calculated with normalized numbers
