# Supplementary material for: PredictSNP: Robust and Accurate Consensus Classifier for Prediction of Disease-Related Mutations
Source: PLoS Comput Biol. 2014 Jan 16;10(1):e1003440. doi: 10.1371/journal.pcbi.1003440 (PMC3894168; doi:10.1371/journal.pcbi.1003440)
Supplement: Table S13 — Performance of consensus classifiers PON-P and PredictSNP with PMD-UNIPROT and MMP datasets. (PDF) [file pcbi.1003440.s019.pdf]

**Table S13.** Performance of consensus classifiers PON-P and PredictSNP with PMD-UNIPROT and MMP datasets.

|                          | PMD-UNIPROT  |                         |              | MMP          |                         |               |
|--------------------------|--------------|-------------------------|--------------|--------------|-------------------------|---------------|
|                          | PON-P        | PredictSNP <sup>a</sup> | PredictSNP   | PON-P        | PredictSNP <sup>a</sup> | PredictSNP    |
| True positives           | 362          | 523                     | 714          | 1,461        | 2,743                   | 3,773         |
| False negatives          | 192          | 89                      | 198          | 875          | 258                     | 683           |
| True negatives           | 268          | 159                     | 298          | 4,152        | 2,619                   | 4,291         |
| False positives          | 65           | 116                     | 220          | 522          | 1,390                   | 3,247         |
| Total                    | <b>887</b>   | <b>887</b>              | <b>1,430</b> | <b>7,010</b> | <b>7,010</b>            | <b>11,994</b> |
| Sensitivity <sup>b</sup> | 0.653        | 0.855                   | 0.783        | 0.625        | 0.914                   | 0.847         |
| Specificity <sup>b</sup> | 0.805        | 0.578                   | 0.575        | 0.888        | 0.653                   | 0.569         |
| Precision <sup>b</sup>   | 0.770        | 0.670                   | 0.648        | 0.848        | 0.725                   | 0.663         |
| NPV <sup>b</sup>         | 0.699        | 0.799                   | 0.726        | 0.703        | 0.884                   | 0.788         |
| Accuracy <sup>b</sup>    | <b>0.729</b> | <b>0.716</b>            | <b>0.679</b> | <b>0.757</b> | <b>0.784</b>            | <b>0.708</b>  |
| MCC <sup>b</sup>         | <b>0.464</b> | <b>0.450</b>            | <b>0.366</b> | <b>0.532</b> | <b>0.588</b>            | <b>0.433</b>  |
| AUC <sup>b</sup>         | <b>0.724</b> | <b>0.740</b>            | <b>0.724</b> | <b>0.790</b> | <b>0.804</b>            | <b>0.787</b>  |

<sup>a</sup> – PredictSNP set up to return predictions for the same number of mutations as PON-P; these mutations have the highest PredictSNP score reflecting the degree of confidence in its decision; <sup>b</sup> – these metrics were calculated with normalized numbers
